# Supplementary material
Source: publisher figshare collection journal article supplement (https://aacr.figshare.com/articles/dataset/_/22431633)

**A**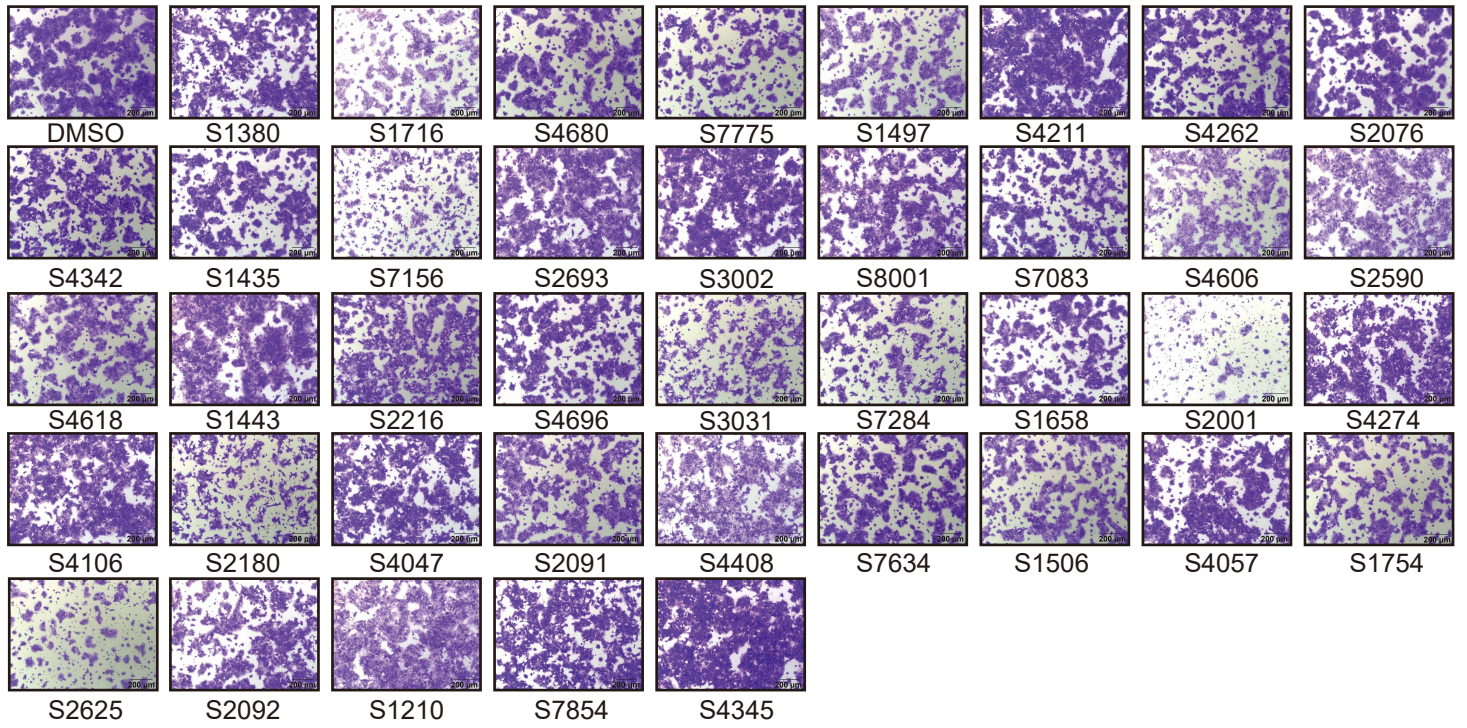**B**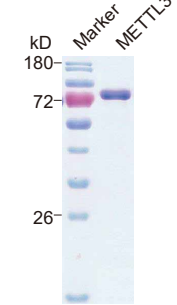**C**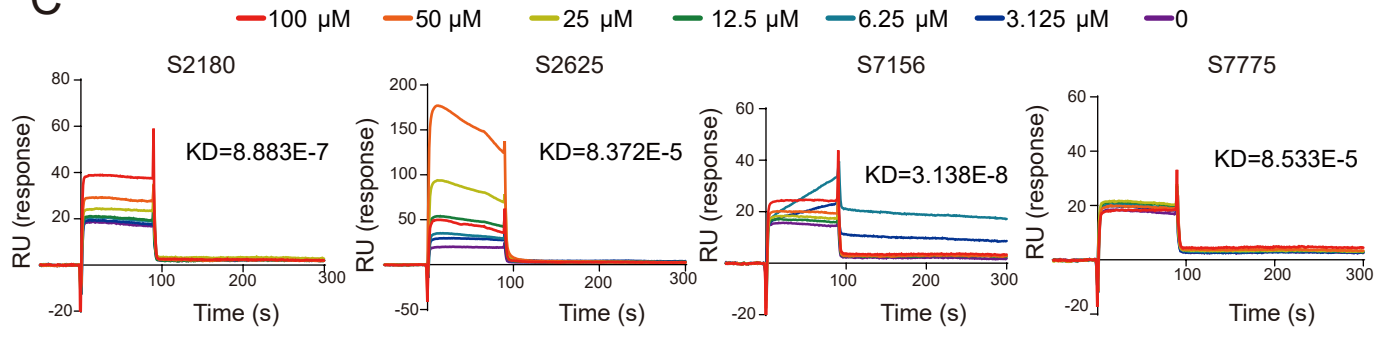**D**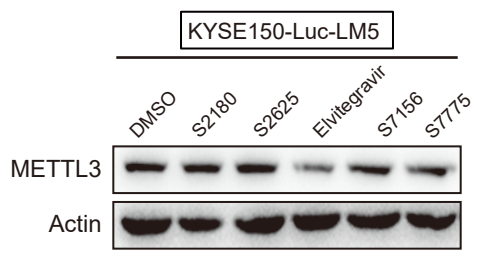**E**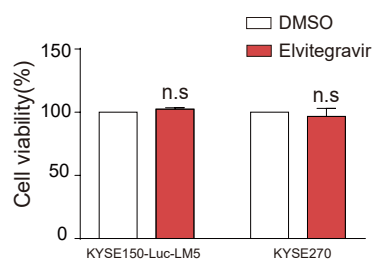**F**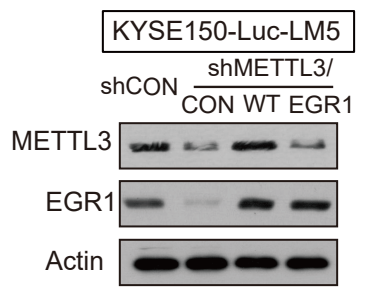**G**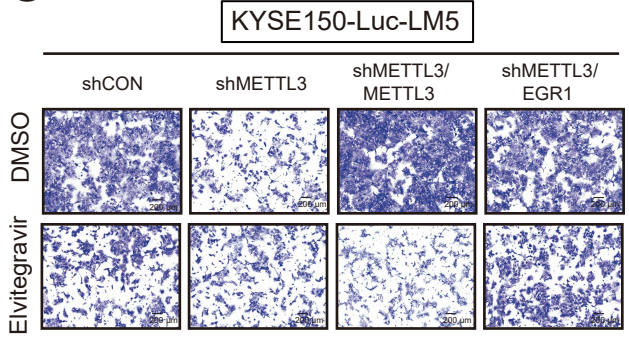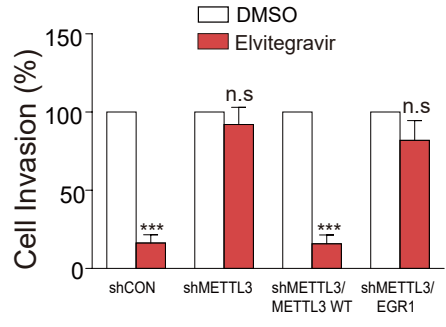

Supplement: Supplementary file 1 [file 39877995]
